# Supplementary material for: Selective crystal growth of magnesium hydroxide via solvent control for dye adsorption
Source: Royal Society of Chemistry journal article supplement (doi:10.1039/d3ce01183f), 2024-01-01
Supplement: d3ce01183f1.pdf [file d3ce01183f1.pdf]

## ELECTRONIC SUPPLEMENTARY MATERIAL

# Selective Crystal Growth of Magnesium Hydroxide via Solvent Control for Dye Adsorption

*Cunjian Weng,<sup>ab</sup> Jing Zhang,<sup>c</sup> Hui Li,<sup>a</sup> Kaitao Li,<sup>c</sup> Wenyan Liu,<sup>c</sup> Xianping Luo,<sup>\*a</sup> Wendi Liu,<sup>\*c</sup> and Yanjun Lin<sup>\*cd</sup>*

<sup>a</sup>School of Resources Engineering, Xian University of Architecture and Technology, Xian 710055, China

<sup>b</sup>Qinghai West magnesium industry Co., Ltd, Delingha, Qinghai 817000, China

<sup>c</sup>State Key Laboratory of Chemical Resource Engineering, Beijing University of Chemical Technology, Beijing, 100029, P. R. China.

<sup>d</sup>School of Chemical Engineering, Qinghai University, Xining, 810016, P. R. China.

## Experimental Section

### Materials

MgCl<sub>2</sub>·6H<sub>2</sub>O, NH<sub>3</sub>·H<sub>2</sub>O, anhydrous ethanol, ethylene glycol (Xilong Chemical Company), NaOH (Beijing Chemical Industry Co. Ltd), Congo red (Sinopharm Chemical Reagent Co. Ltd) were used as purchased without further purification. The deionized water was used in all the experimental processes.

### Synthesis of magnesium hydroxide with different ratios of ethanol/water

In the molar ratio 1:2 (MgCl<sub>2</sub>·6H<sub>2</sub>O to ammonia), 40.66 g of MgCl<sub>2</sub>·6H<sub>2</sub>O was dissolved in 100 mL deionized water as salt solution (2 mol/L), and 27.248 g of ammonia were dissolved in 100 mL deionized water as base solution. Then, these two solutions were rapidly mixed to generate a large number of nuclei by using a

rotating liquid film reactor at room temperature. A quantity of anhydrous ethanol was added to the slurry stirred in the nucleation of a volume fraction of 5%, 10%, 25%, and 50%. The mixed slurry was transferred to a high pressure reactor for crystallization at 80 °C for 6 h, followed by cooling to room temperature. After washing with deionized water for about 4~6 times, the obtained precipitate was dried in a drying oven at 60 °C for 8 h to obtain magnesium hydroxide.

### **Synthesis of magnesium hydroxide with different ratios of ethylene glycol/water**

Similar to the synthesis method above, the ethanol was replaced with ethylene glycol, other conditions remained unchanged, and the magnesium hydroxide samples were synthesized with the ratio of ethylene glycol being 5%, 7.5%, 10%.

### **Characterizations**

The crystal structure of magnesium hydroxide was analyzed by X-ray powder diffractometer (Rigaku, D/max-Ultima III) using Cu target  $K\alpha$  rays at 40 kV and 30 mA, scanning step of 5-70° and scanning speed of 10°/min. The surface morphology of magnesium hydroxide was analyzed using a scanning electron microscope (ZEISS, Supra 55). The specific surface area of magnesium hydroxide was analyzed using a fully automated specific surface area and pore size analyzer (Quadasorb SI, Kantar Instruments, USA). Before testing, 0.1 g of sample was weighed and placed in a sample tube and degassed under vacuum for 6 h at 120 °C. The secondary particle size distribution was analyzed using a laser particle size tester (Mastersize 2000, Malvern, UK). The samples were ultrasonicated for 5 min in a cell pulverizer with a power of 900 W. The zeta potential of magnesium hydroxide was tested by a particle size analyzer (Malvern, model: Zetasizer Nano ZS90). The refractive index of the particles of  $Mg(OH)_2$  was 1.580 and the absorptivity was 0.01. The zeta potential of  $Mg(OH)_2$  was measured by the same analyzer (Malvern, model: Zetasizer Nano ZS90).

## Adsorption experiment

A certain concentration of Congo red solution was prepared as the simulated dye wastewater, and the pH of the solution was adjusted with sodium hydroxide solution and dilute hydrochloric acid. A certain amount of magnesium hydroxide powder and 100 mL of the simulated dye wastewater were added to a 250 mL conical flask, and the adsorption was carried out by shaking in a water-bath shaker. After reaching the equilibrium of the adsorption the suspension was centrifuged for 3 min at 4000 rad/min, and the supernatant was taken as the reference solution. The absorbance of the solution was measured at 500 nm. The absorbance of the solutions was tested using a UV-Vis spectrophotometer (Shimadzu, Japan, UV-2501PC). The content of the substance was calculated by measuring the absorbance at the characteristic wavelength of the sample.

## Adsorption isotherm

In order to investigate the thermodynamic behavior of the adsorption process of magnesium hydroxide on CR, the Langmuir and Freundlich models were chosen to fit the experimental data linearly in this experiment.

Langmuir model is a monomolecular layer adsorption process, homogeneous adsorption, , and the adsorption equilibrium reached is a dynamic equilibrium. Its linear expression is as follows:

$$\frac{C_e}{q_e} = \frac{1}{K_L \times q_m} + \frac{C_e}{q_m}$$

where  $K_L$  is the adsorption equilibrium constant,  $q_e$  is the equilibrium adsorbed amount of the adsorbent (mg/g),  $C_e$  is the concentration of the solute at the time of adsorption equilibrium (mg/L), and  $q_m$  is the maximum adsorbed amount (mg/g).

The Freundlich model is based on a solid surface that is inhomogeneous and has different

adsorption sites and adsorption energies. Its linear expression is as follows:

$$\lg q_e = \lg K_F + \frac{1}{n} \lg C_e$$

where  $K_F$  and  $n$  are constants in the model,  $K_F$  is related to the adsorption efficiency,  $n$  reflects the strength of the adsorption effect,  $C_e$  is the concentration of the solute at the adsorption equilibrium (mg/L), and  $q_e$  is the equilibrium adsorption amount of the adsorbent (mg/g).

### Adsorption kinetics

In order to investigate the kinetics of the adsorption process, the adsorption process of magnesium hydroxide on Congo red is fitted by the quasi-primary and quasi-secondary kinetic equations.

The linear expression of the quasi-primary kinetic model is as follows:

$$\lg(q_e - q_t) = \lg q_e - k_1 t$$

where  $q_e$  is the adsorbed amount at adsorption equilibrium (mg/g),  $k_1$  is the first-order kinetic adsorption constant, and  $q_t$  is the adsorbed amount of Congo red by magnesium hydroxide at time (mg/g). Fitting the curve graphically to  $t$  with  $\lg(q_e - q_t)$  gives  $k_1$ .

The linear expression of the quasi-secondary kinetic model is as follows:

$$\frac{t}{q_e} = \frac{1}{K_L q_e^2} + \frac{t}{q_e}$$

where  $q_e$  is the amount adsorbed at adsorption equilibrium (mg/g),  $k_2$  is the first-order kinetic adsorption constant, and  $q_t$  is the amount of Congo red adsorbed by magnesium hydroxide at time (mg/g). Fitting the curve graphically with  $t/q_t$  against  $t$  gives  $k_2$ .

## Supplementary figures

**Table S1** Particle size results of magnesium hydroxide obtained different volume ratio of ethanol

|     | <b>D(50)/<math>\mu\text{m}</math></b> | <b>D(90)/<math>\mu\text{m}</math></b> |
|-----|---------------------------------------|---------------------------------------|
| 0%  | 0.932                                 | 2.017                                 |
| 5%  | 0.076                                 | 0.541                                 |
| 10% | 0.075                                 | 0.477                                 |
| 25% | 0.075                                 | 0.403                                 |
| 50% | 0.061                                 | 0.378                                 |

**Table S2** Particle size results of magnesium hydroxide obtained different volume ratio of ethylene glycol

|      | <b>D(50)/<math>\mu\text{m}</math></b> | <b>D(90)/<math>\mu\text{m}</math></b> |
|------|---------------------------------------|---------------------------------------|
| 0%   | 0.932                                 | 2.017                                 |
| 5%   | 0.061                                 | 0.308                                 |
| 7.5% | 0.050                                 | 0.376                                 |
| 10%  | 0.050                                 | 0.377                                 |

**Table S3** Fitting parameters of kinetic model for CR adsorption on magnesium hydroxide: a.

$I_{001}/I_{101} = 1.258$ , b.  $I_{001}/I_{101} = 1.023$ , c.  $I_{001}/I_{101} = 0.822$

| <b>Mg(OH)<sub>2</sub></b> | <b>q<sub>e, exp</sub></b><br>(mg/g) | <b>Pseudo-first-order model</b>              |                                |                      | <b>Pseudo-second-order model</b>                             |                                |                      |
|---------------------------|-------------------------------------|----------------------------------------------|--------------------------------|----------------------|--------------------------------------------------------------|--------------------------------|----------------------|
|                           |                                     | <b>k<sub>1</sub></b><br>(min <sup>-1</sup> ) | <b>q<sub>e</sub></b><br>(mg/g) | <b>R<sup>2</sup></b> | <b>k<sub>2</sub>×10<sup>-4</sup></b><br>(min <sup>-1</sup> ) | <b>q<sub>e</sub></b><br>(mg/g) | <b>R<sup>2</sup></b> |
| a                         | 46.762                              | 0.0191                                       | 34.752                         | 0.955                | 7.992                                                        | 45.579                         | 0.997                |
| b                         | 45.744                              | 0.0192                                       | 39.901                         | 0.920                | 8.977                                                        | 44.131                         | 0.994                |
| c                         | 47.359                              | 0.0159                                       | 10.392                         | 0.216                | 12.154                                                       | 43.802                         | 0.976                |
